# Supplementary material for: Microbial Enrichment Techniques on Syngas and CO2 Targeting Production of Higher Acids and Alcohols
Source: MDPI journal article supplement (doi:10.3390/molecules28062562), 2023-03-11
Supplement: s1 [file s1]

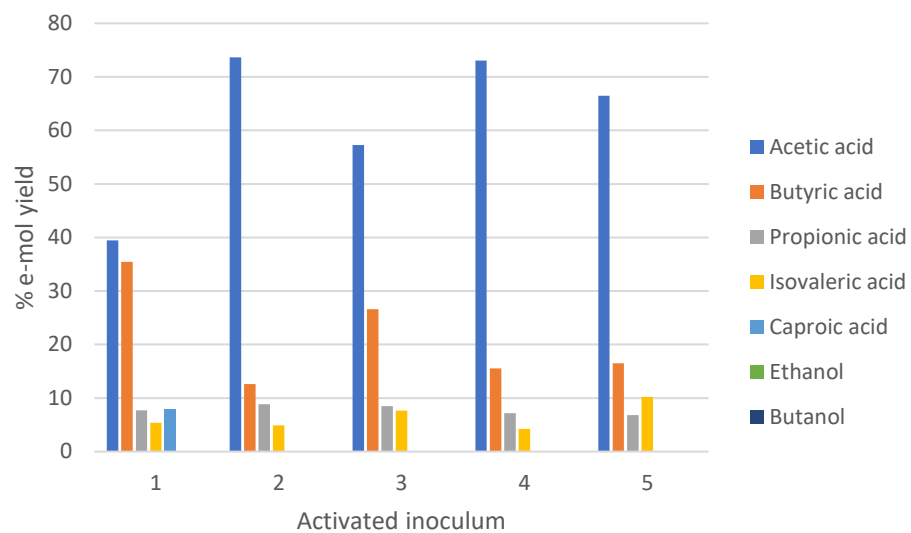

**Figure S1.** Distribution of % e-mol yields of all products at the end of the activation of the inoculum.
